# Supplementary material
Source: PubMed Central journal article supplement (PMC4475280)
Supplement: NIHMS691966-supplement-5.pdf [file NIHMS691966-supplement-5.pdf]

**A**

M.musculus Ser148: RIGGGG**S**VVDC  
 R.norvegicus Ser148: RIGGGG**S**VVDC  
 H.sapiens Ser148: RIGTGG**S**VVDC  
 P.troglodytes Ser148: RIGTGG**S**VVDC  
 B.taurus Ser148: RIGTGG**S**VVDC  
 G.gallus Ser148: RIGTGG**S**VVDC

**B**

|        | Score | Expectation | MD-score | Peptide Sequence                        |
|--------|-------|-------------|----------|-----------------------------------------|
| Ser148 | 80.25 | 0.0000011   | 37.47    | R.IGTGG <b>S</b> VVDCR.G + Phospho (ST) |

**C**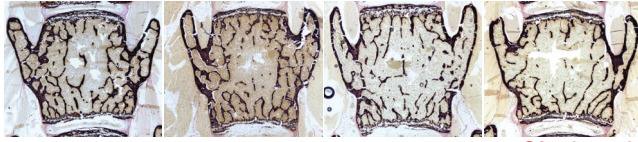

|                                              | <i>Glut1<sup>fl/fl</sup></i> | <i>Smurf1<sup>+/-</sup></i> | <i>Glut1<sup>ocn-/-</sup></i> | <i>Glut1<sup>ocn-/-</sup>; Smurf1<sup>+/-</sup></i> |
|----------------------------------------------|------------------------------|-----------------------------|-------------------------------|-----------------------------------------------------|
| BV/TV (%)                                    | 17.63 ± 0.62                 | 16.76 ± 0.80                | 12.16 ± 0.76 <sup>#</sup>     | 12.53 ± 0.88 <sup>*</sup>                           |
| N.Ob/T.Ar                                    | 177.28 ± 8.29                | 150.82 ± 7.93               | 130.0 ± 6.95 <sup>*</sup>     | 112.0 ± 5.67 <sup>*</sup>                           |
| MAR (mm/y)                                   | 1.60 ± 0.05                  | 1.64 ± 0.14                 | 1.15 ± 0.09 <sup>*</sup>      | 1.22 ± 0.13 <sup>*</sup>                            |
| BFR/BS (μm <sup>3</sup> /μm <sup>2</sup> /y) | 155.19 ± 17.40               | 143.17 ± 21.92              | 80.00 ± 10.27 <sup>*</sup>    | 86.49 ± 10.0 <sup>*</sup>                           |

Figure S5
