# Supplementary material
Source: PubMed Central journal article supplement (PMC4475280)

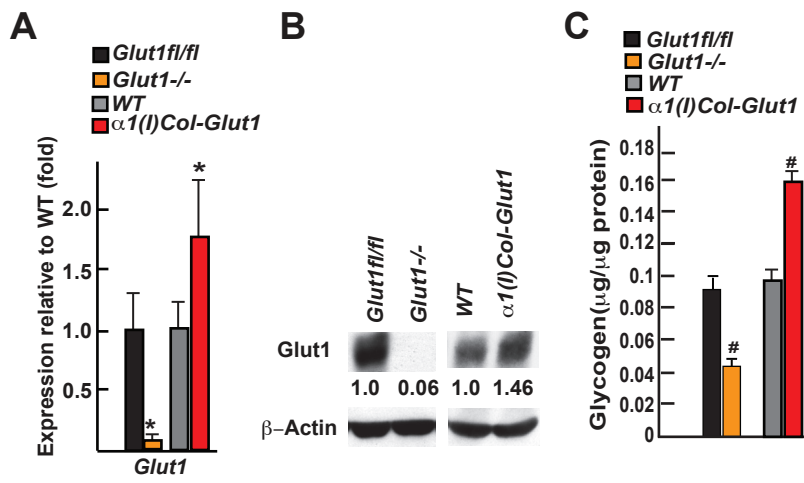

Figure S1

Supplement: NIHMS691966-supplement-1.pdf [file NIHMS691966-supplement-1.pdf]

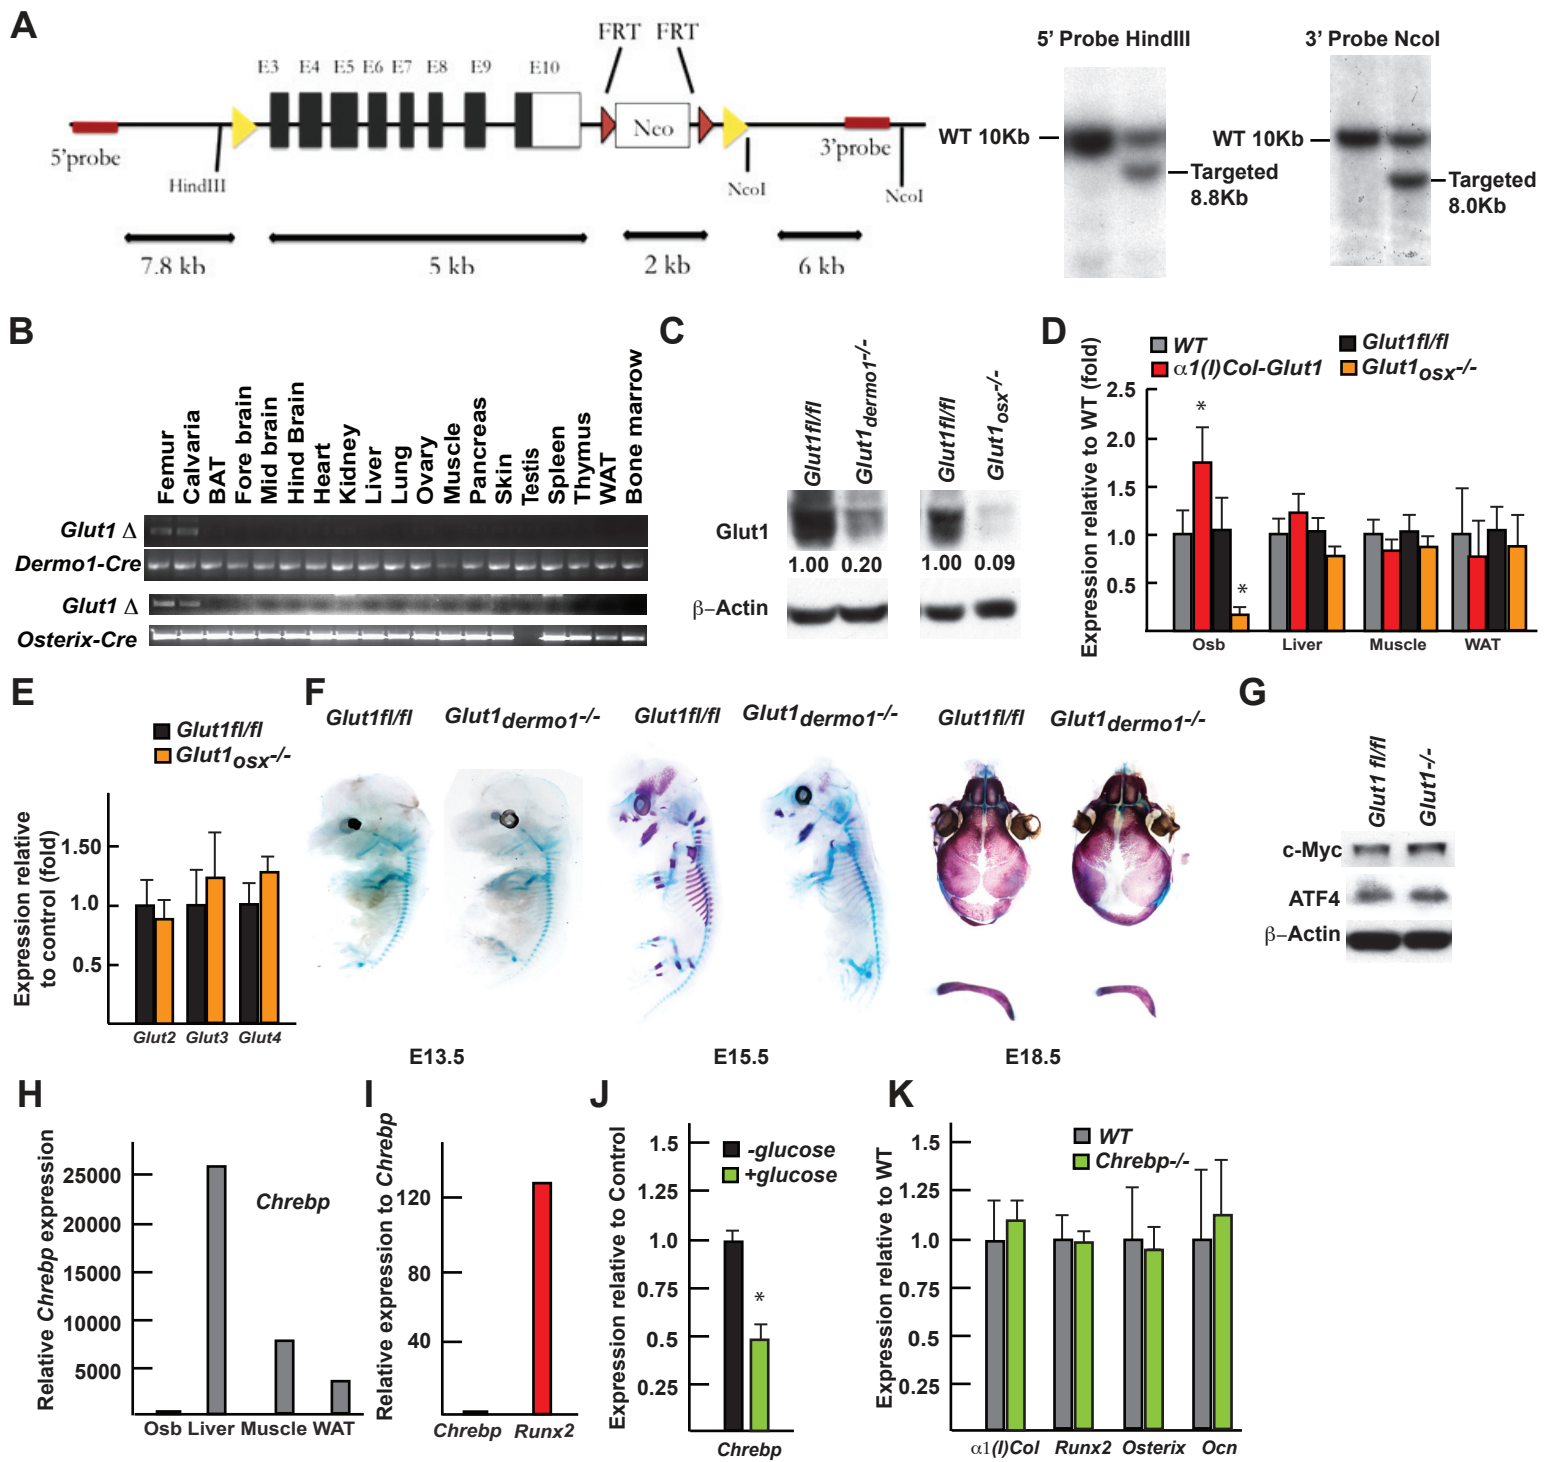

Figure S2

Supplement: NIHMS691966-supplement-2.pdf [file NIHMS691966-supplement-2.pdf]

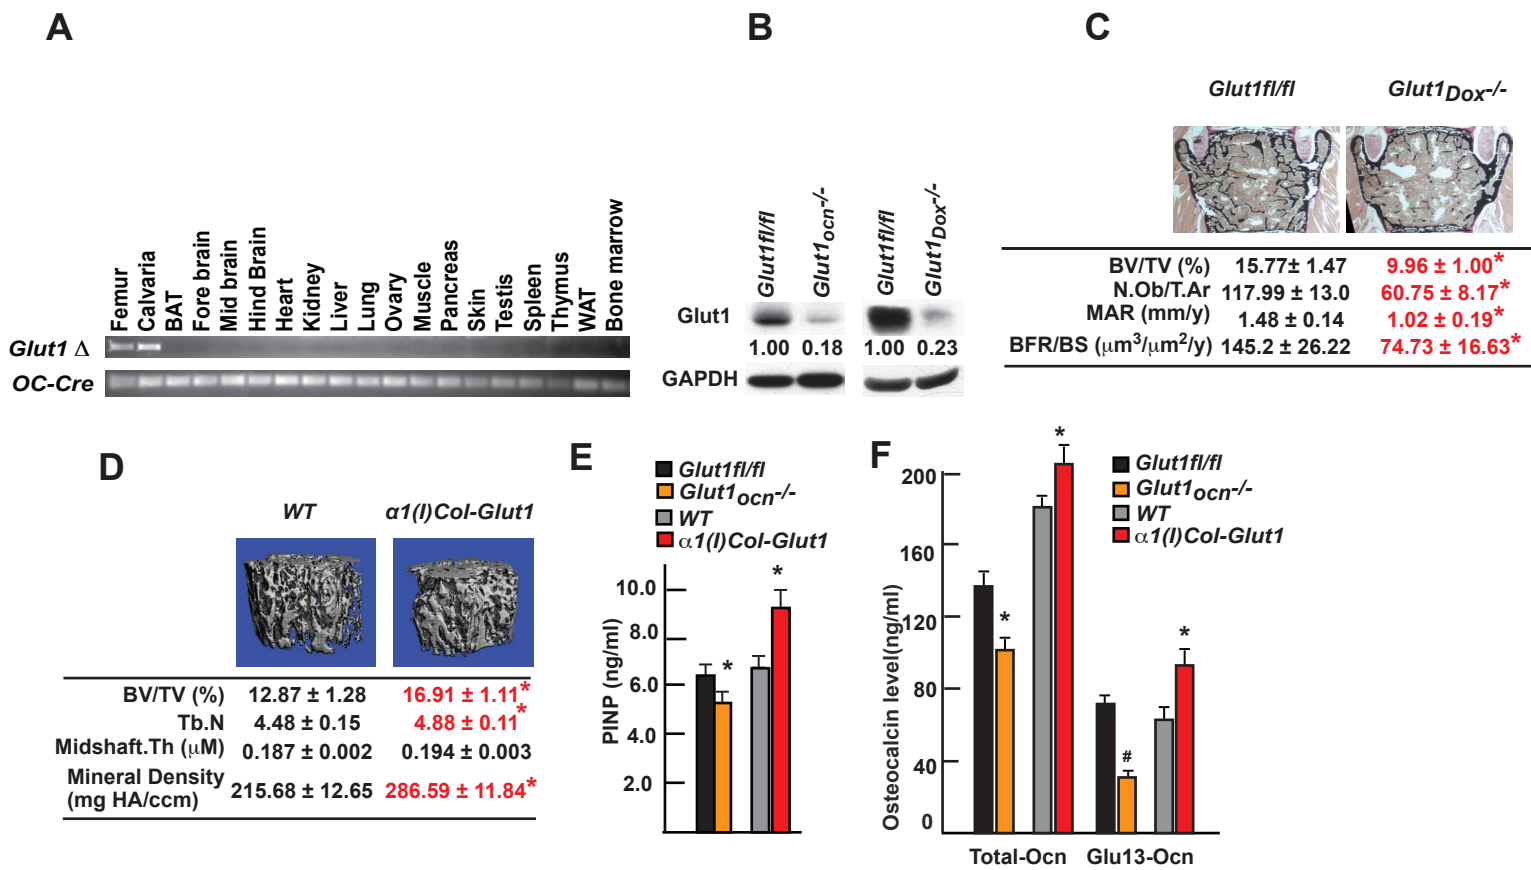

Figure S3

Supplement: NIHMS691966-supplement-3.pdf [file NIHMS691966-supplement-3.pdf]

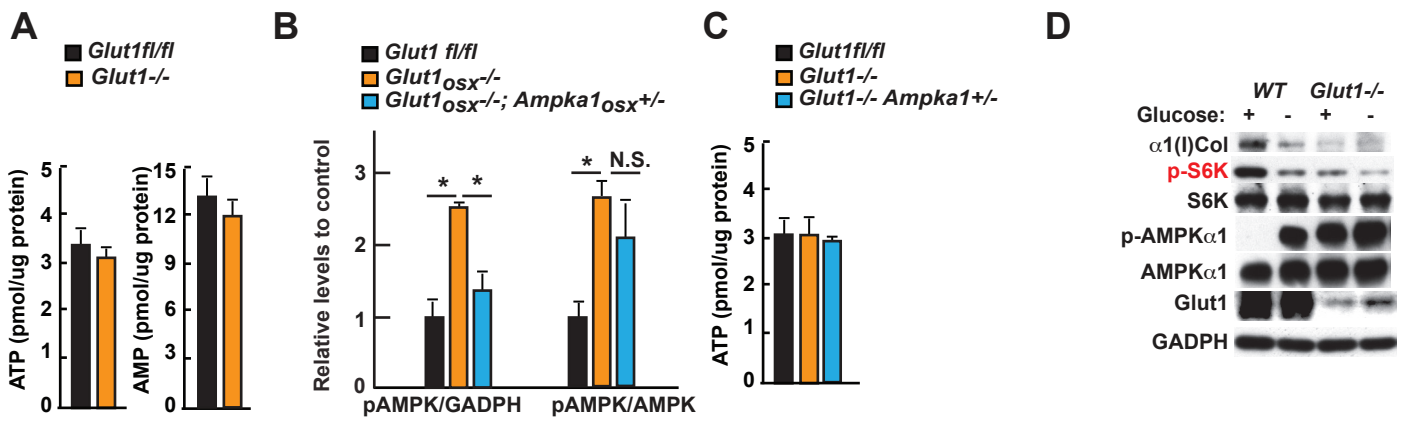

Figure S4

Supplement: NIHMS691966-supplement-4.pdf [file NIHMS691966-supplement-4.pdf]

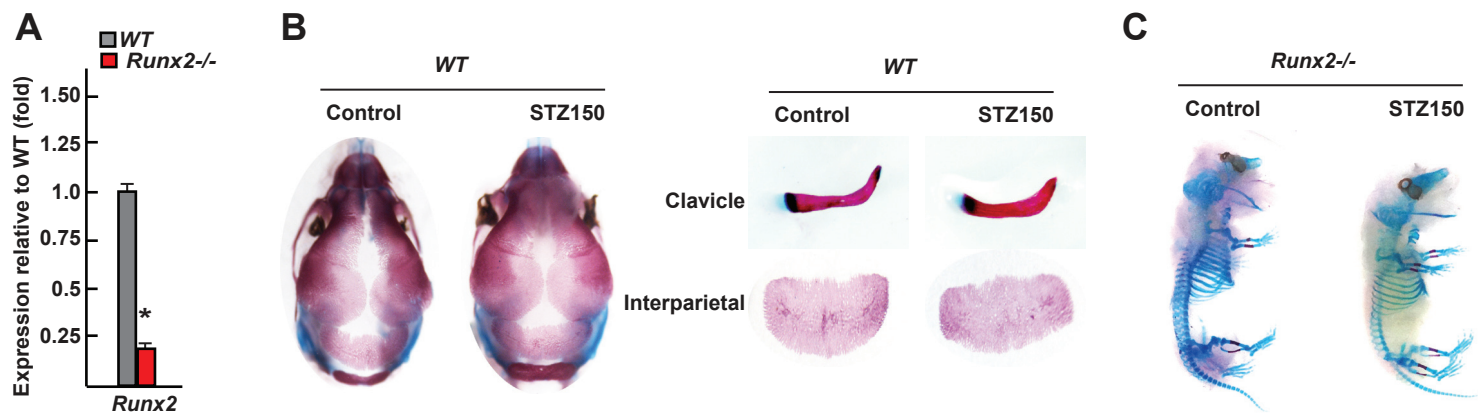

Figure S6

Supplement: NIHMS691966-supplement-6.pdf [file NIHMS691966-supplement-6.pdf]

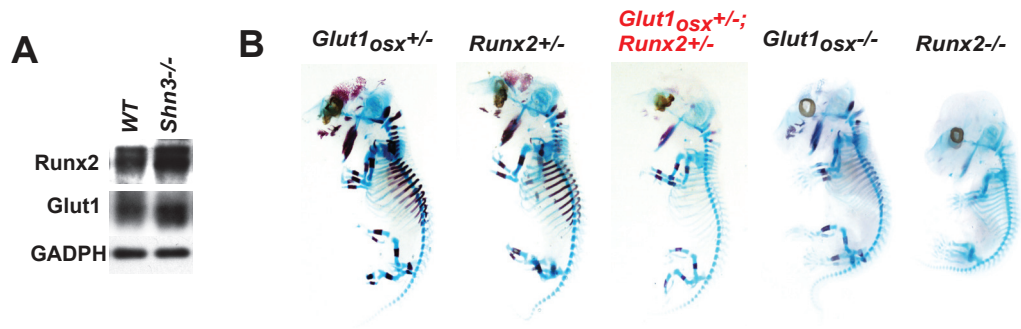

**C**

| Blood Glucose (mg/dl) | Mothers        | Fetus         |
|-----------------------|----------------|---------------|
| Control               | 151.8 ± 7.57   | 45.0 ± 1.92   |
| STZ (150 mg/kg)       | 349.6 ± 16.64* | 233.7 ± 33.5* |

Figure S7

Supplement: NIHMS691966-supplement-7.pdf [file NIHMS691966-supplement-7.pdf]
